# Supplementary material for: Significantly enhanced dehydrogenation properties of calcium borohydride combined with urea
Source: Royal Society of Chemistry journal article supplement (doi:10.1039/c4dt01355g), 2014-01-01
Supplement: c4dt01355g1.pdf [file c4dt01355g1.pdf]

## *Supplementary Information*

### **Significantly Enhanced Dehydrogenation Properties of Calcium Borohydride Combined with Urea**

Hailiang Chu,<sup>\* ab</sup> Shujun Qiu,<sup>b</sup> Lin Liu,<sup>a</sup> Yongjin Zou,<sup>b</sup> Cuili Xiang,<sup>b</sup> Huanzhi Zhang,<sup>b</sup>

Fen Xu,<sup>b</sup> Lixian Sun,<sup>b</sup> Huaiying Zhou<sup>b</sup> and Guotao Wu<sup>\* a</sup>

<sup>a</sup> Dalian Institute of Chemical Physics, Chinese Academy of Sciences, No. 457,  
Zhongshan Road, Dalian 116023, PR China

<sup>b</sup> School of Materials Science and Engineering, Guilin University of Electronic  
Technology, No. 1, Jinji Road, Guilin 541004, PR China

E-mail: chuhailiang@guet.edu.cn; wgt@dicp.ac.cn;

Tel.: +86-773-2216607; Fax: +86-773-2290129.

## Experimental details:

### *Materials*

Ca(BH<sub>4</sub>)<sub>2</sub> was synthesized by means of the metathesis of CaCl<sub>2</sub> and NaBH<sub>4</sub> in tetrahydrofuran (THF) solution according to our previous report [S1]:

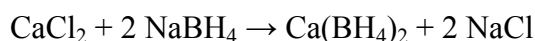

CO(NH<sub>2</sub>)<sub>2</sub> (99%) (Kermel chemicals of Tianjin, China) was used without further purification. Ca(BH<sub>4</sub>)<sub>2</sub>·4CO(NH<sub>2</sub>)<sub>2</sub> was synthesized by balling milling Ca(BH<sub>4</sub>)<sub>2</sub> and CO(NH<sub>2</sub>)<sub>2</sub> in the molar ratio of 1:4 on a Retsch PM400 under argon atmosphere for 2 hours. To reduce heat effect in ball milling, the mill was set to revolve for 60 s in one direction and pause for 15 s, and then revolve in reversed direction. To avoid oxygen and moisture contaminations, all the manipulations are conducted inside a glove box filled with purified argon (O<sub>2</sub> < 1.0 ppm; H<sub>2</sub>O < 1.0 ppm).

### *Characterization*

Structural identifications were carried on a PANalytical X'pert diffractometer (Cu radiation, 40 kV, 40 mA). FT-IR measurements were conducted on a Varian 3100 unit in DRIFT mode. Temperature-programmed desorption (TPD) using purified Argon as carrier gas was conducted on a home-made system [S2] combined with a micro-reactor and an on-line mass spectrometer (HPR20, from Hiden). *Ca.* 50 mg sample was loaded and temperature was raised from room temperature to 500 °C at a ramping rate of 2 °C min<sup>-1</sup>. Differential Scanning Calorimetry (DSC) measurements were done on a Netzsch STA449C thermal analysis system. Dynamic flow mode and a heating rate of 2 °C/min were applied to 5 mg sample. Volumetric release for quantitative measurements of hydrogen desorption were carried out on a HyEnergy PCT apparatus (PCTPro 2000). <sup>11</sup>B solid-state MAS NMR experiments were conducted at room temperature on a Bruker Advance III 500 NMR spectrometer at a frequency of 128.28 MHz, using a 4 mm MAS NMR probe and the <sup>11</sup>B NMR signals were referenced to BF<sub>3</sub>·Et<sub>2</sub>O at 0 ppm.

## Figures and Tables

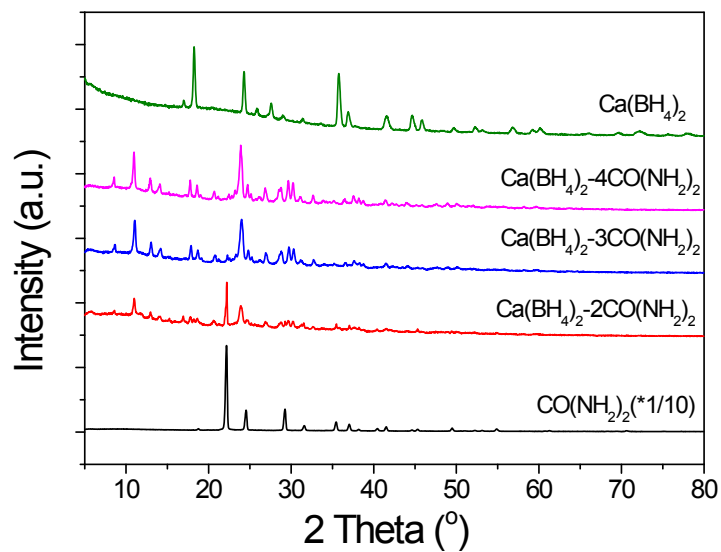

**Fig. S1** XRD patterns of  $\text{Ca}(\text{BH}_4)_2$ ,  $\text{CO}(\text{NH}_2)_2$ , and  $\text{Ca}(\text{BH}_4)_2\text{-CO}(\text{NH}_2)_2$  in different molar ratios.

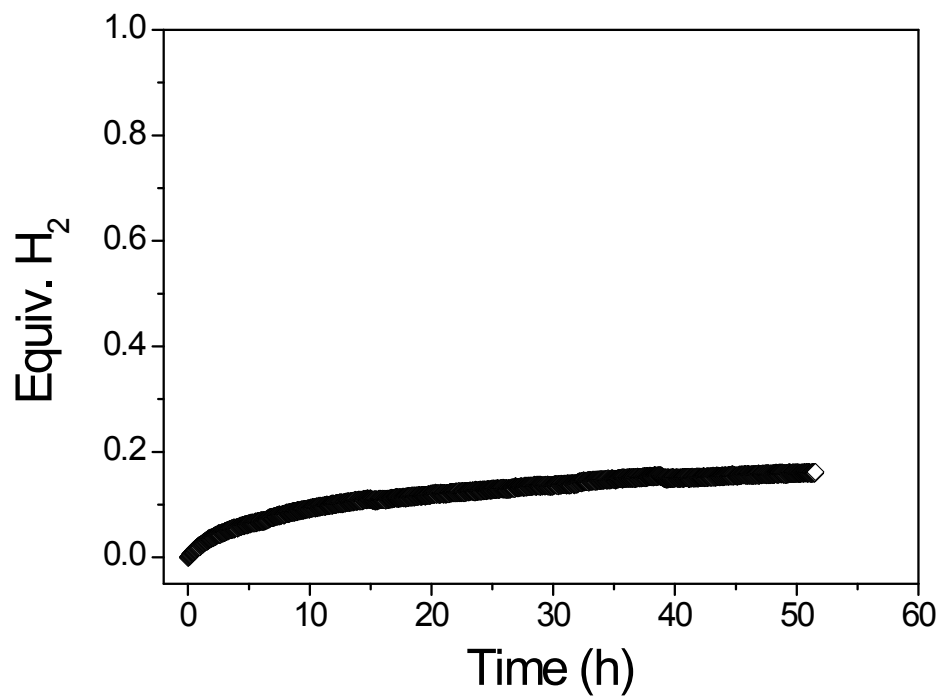

**Fig. S2** Time dependence of hydrogen desorption from pristine Ca(BH<sub>4</sub>)<sub>2</sub> at 250 °C.

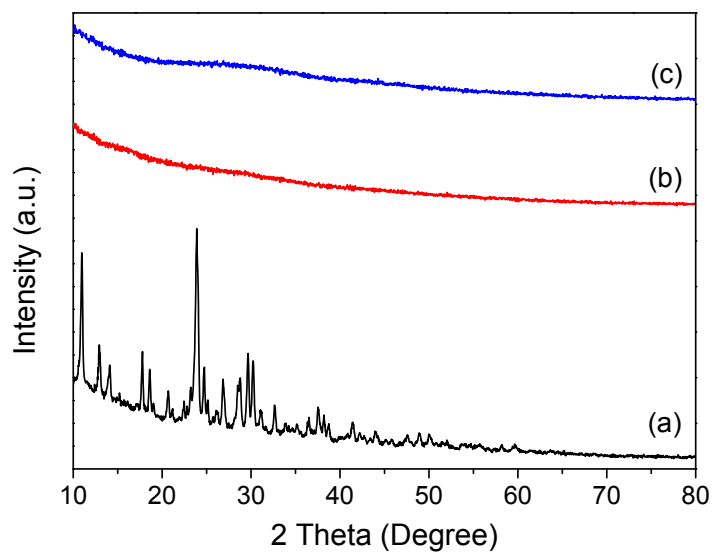

**Fig. S3** XRD patterns of (a)  $\text{Ca}(\text{BH}_4)_2 \cdot 4\text{CO}(\text{NH}_2)_2$  and its dehydrogenated products collected at different temperatures (b) at 150 °C and (c) 250 °C.

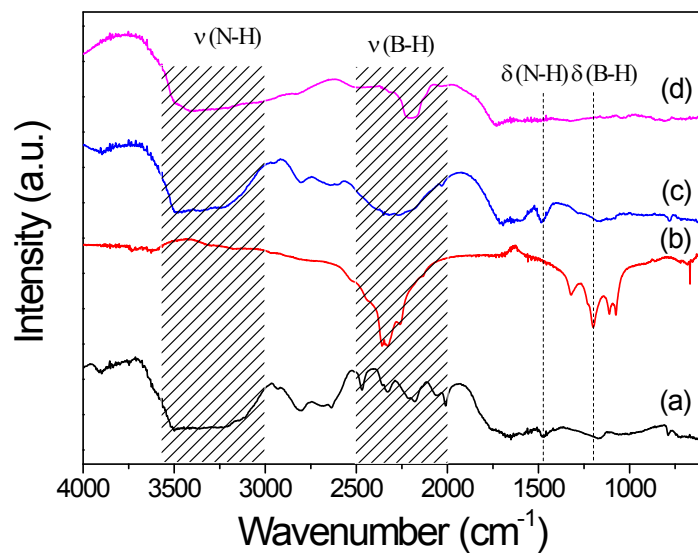

**Fig. S4** FT-IR spectra of (a)  $\text{CO}(\text{NH}_2)_2$ , (b)  $\text{Ca}(\text{BH}_4)_2$ , (c)  $\text{Ca}(\text{BH}_4)_2 \cdot 4\text{CO}(\text{NH}_2)_2$ , and (d) post-dehydrogenated  $\text{Ca}(\text{BH}_4)_2 \cdot 4\text{CO}(\text{NH}_2)_2$  samples collected at 250 °C.

Reference:

[S1] H. L. Chu, S. J. Qiu, L. X. Sun and G. T. Wu, *J. Renewable Sustainable Energy*, 2014, **6**, 013105.

[S2] H. L. Chu, Z. T. Xiong, G. T. Wu, J. P. Guo, T. He and P. Chen, *Dalton Trans.*, 2010, **39**, 10585-10587.
